# Supplementary material for: A Comprehensive Assessment of the Racial and Ethnic Disparities in the Incidence of Gastric Cancer in the United States, 1992-2014
Source: PubMed Central journal article supplement — Cancer Res Treat. 2018 Jun 19;51(2):519–29. doi: 10.4143/crt.2018.146 (PMC6473285; doi:10.4143/crt.2018.146), 2018-06-19
Supplement: crt-2018-146-suppl1.pdf [file crt-2018-146-suppl1.pdf]

**S1 Table.** Summary of characteristics of health disparity measures

| Disparity measure        | Calculation                                                                                                                                                                                                                                                                                                                                                                                                                          | Value if no disparity | Reference rate | Incorporating rates of all groups | Population-weighted |
|--------------------------|--------------------------------------------------------------------------------------------------------------------------------------------------------------------------------------------------------------------------------------------------------------------------------------------------------------------------------------------------------------------------------------------------------------------------------------|-----------------------|----------------|-----------------------------------|---------------------|
| <b>Absolute measures</b> |                                                                                                                                                                                                                                                                                                                                                                                                                                      |                       |                |                                   |                     |
| RD                       | Absolute difference between the highest incidence rate ( $IR_1$ ) and the lowest incidence rate ( $IR_2$ ), i.e. $RD = IR_1 - IR_2$                                                                                                                                                                                                                                                                                                  | 0                     | Lowest         | No                                | No                  |
| BGV                      | Sum of all squared deviations from a population average of all racial/ethnic groups which are weighted by population size.<br>$BGV = \sum_{j=1}^J p_j (IR_j - \mu)^2$ <p>where <math>IR_j</math> and <math>p_j</math> indicate the incidence rate and the population size of the <math>j</math>th group, respectively, <math>\mu</math> is the average rate in the total population, and <math>J</math> is the number of groups.</p> | 0                     | Average        | Yes                               | Yes                 |
| <b>Relative measures</b> |                                                                                                                                                                                                                                                                                                                                                                                                                                      |                       |                |                                   |                     |
| RR                       | The highest divided by the lowest incidence rate, i.e. $RR = IR_1/IR_2$ .                                                                                                                                                                                                                                                                                                                                                            | 1                     | Lowest         | No                                | No                  |
| IDisp                    | Sum of the average difference between the rates in all groups and a reference rate, which is calculated as:<br>$IDisp = \left( \sum_{j=1}^{J-1}  IR_j - IR_{ref}  / J - 1 \right) / IR_{ref} \times 100$                                                                                                                                                                                                                             | 0                     | Lowest         | Yes                               | No                  |

where  $IR_j$  indicates the incidence rate in the  $j$ th group,  $IR_{ref}$  is the rate in the reference population, which is the lowest rate in this study, and  $J$  is the number of racial/ethnic groups.

|     |                                                                                                                                                                                        |   |         |     |     |
|-----|----------------------------------------------------------------------------------------------------------------------------------------------------------------------------------------|---|---------|-----|-----|
| MLD | Summarizing the disproportionality of the percentages of the total number of cancer cases from all groups as compared with the percentages of population size in the total population. | 0 | Average | Yes | Yes |
|-----|----------------------------------------------------------------------------------------------------------------------------------------------------------------------------------------|---|---------|-----|-----|

$$MLD = \sum_{j=1}^J p_j (-\ln r_j)$$

where  $p_j$  and  $r_j$  indicate the proportion of the total population and the ratio of the incidence rate relative to the population average rate in the  $j$ th group, respectively.

|   |  |   |         |     |     |
|---|--|---|---------|-----|-----|
| T |  | 0 | Average | Yes | Yes |
|---|--|---|---------|-----|-----|

$$T = \sum_{j=1}^J p_j r_j \ln r_j$$

where  $p_j$  and  $r_j$  indicate the proportion of the total population and the ratio of the incidence rate relative to the population average rate in the  $j$ th group, respectively.

BGV, between group variance; IDisp, index of disparity; MLD, mean log deviation; RD, range difference; RR, range ratio; T, Theil index.
